# Supplementary material for: Clonal Spread of Extended-Spectrum Cephalosporin-Resistant Enterobacteriaceae Between Companion Animals and Humans in South Korea
Source: Front Microbiol. 2019 Jun 18;10:1371. doi: 10.3389/fmicb.2019.01371 (PMC6591270; doi:10.3389/fmicb.2019.01371)
Supplement: TABLE S1 — Samples that grew both E. coli and K. pneumoniae isolates from dog, cat, and the environment. [file Table_1.xlsx]

## Sheet: Sheet1
		TABLE S1 Samples that grew both E. coli and K. pneumoniae isolates from dog, cat, and the environment
		Sample		Isolates carrying ESC-resistance gene
		Origin	No.	ESC-resistant E. coli	ESC-resistant K. pneumoniae
		Dog	58	CMY-2	CTX-M-14
			76	CMY-2	CTX-M-15
			96	CTX-M-15 + CMY-2 + NDM-5	CTX-M-15
			122	CTX-M-15 + CMY-2 + NDM-5	CTX-M-15
			124	CTX-M-15 + CMY-2 + NDM-5	CTX-M-15
			129	CTX-M-15 + CMY-2 + NDM-5	CTX-M-15
			231	CTX-M-55	SHV-28
			244	CMY-2	CMY-2 + DHA-1
			248	CMY-2	SHV-12 + DHA-1
			253	CMY-2	CTX-M-15
			277	CMY-2	CTX-M-15
			287	CTX-M-55	CTX-M-15
			288	CMY-2	CTX-M-15
			289	CMY-2	SHV-12 + DHA-1
			421	CMY-2	CTX-M-15 + DHA-1
			431	CTX-M-14	CTX-M-15 + DHA-1
			551	CTX-M-14	CTX-M-15
		Cat	108	CMY-2	DHA-1
		Environment	179	CMY-2	CTX-M-15 + DHA-1
		Human	-	-	-
